# Supplementary material for: Dysfunctions Associated with Methylation, MicroRNA Expression and Gene Expression in Lung Cancer
Source: PubMed Central journal article supplement (PMC3422260; doi:10.1371/journal.pone.0043441), 2012-08-17
Supplement: pone.0043441.s006.pdf [file pone.0043441.s006.pdf]

**Table S3 - The top 20 dysfunctional gene sets in lung cancer.**

| Rank | GO term                                                | Lung cancer associated mRNA                                                                                       | Lung cancer associated microRNA                                                                               | Lung cancer associated methylation                                                      | Relationships among mRNA, microRNA and methylation in lung cancer                                                                                                                                                                                                                                      |
|------|--------------------------------------------------------|-------------------------------------------------------------------------------------------------------------------|---------------------------------------------------------------------------------------------------------------|-----------------------------------------------------------------------------------------|--------------------------------------------------------------------------------------------------------------------------------------------------------------------------------------------------------------------------------------------------------------------------------------------------------|
| 1    | GO:0048585_negative regulation of response to stimulus | TNF-a[1], IL8[2], NFKBIA, NFKBID, SFRP1, WWOX, SLIT2[3]                                                           | hsa-miR-125a-3p, hsa-miR-155[4], hsa-let-7a, hsa-miR-200b/c, hsa-miR-205[5, 6], hsa-miR-29 a/b/c[7]           | IL8, SFRP1, SLIT2                                                                       | The enforced expression of miR-29s in lung cancer cell can restore normal patterns of DNA methylation, induces reexpression of methylation -silenced tumor suppressor genes, such as FHIT and WWOX, and inhibits tumorigenicity[7]                                                                     |
| 2    | GO:0007517_muscle organ development                    | CHRNA1, ERBB2, TWIST1[8]                                                                                          | hsa-miR-125a-3p, hsa-miR-155[9], hsa-miR-200b/c, hsa-miR-205, hsa-miR-29a/b/c                                 | ERBB2, TWIST1                                                                           |                                                                                                                                                                                                                                                                                                        |
| 3    | GO:0048514_blood vessel morphogenesis                  | ERBB2, CDH13, SFRP1, EGFL7, VEGFA, SLIT2                                                                          | Hsa-miR-375, hsa-miR-34b, hsa-miR-155, hsa-miR-200b/c, hsa-miR-205, hsa-miR-29a/b/c                           | ERBB2, SFRP1, SLIT2                                                                     | Promoters of miR-34b, EGFL7 are methylation, up regulate c-Met and Crk expressions[10]                                                                                                                                                                                                                 |
| 4    | GO:0051146_striated muscle cell differentiation        | CHRNA1, ERBB2                                                                                                     | hsa-miR-125a-3p, hsa-miR-155                                                                                  | ERBB2                                                                                   |                                                                                                                                                                                                                                                                                                        |
| 5    | GO:0001525_angiogenesis                                | VEGFC[11], IL8, ERBB2, CDH13, SFRP1, EGFL7, VEGFA, SLIT2                                                          | Hsa-miR-375, hsa-miR-155, hsa-miR-200b/c, hsa-miR-205, hsa-miR-29a/b/c                                        | IL8, ERBB2, CDH13, SFRP1, SLIT2                                                         |                                                                                                                                                                                                                                                                                                        |
| 6    | GO:0045595_regulation of cell differentiation          | VEGFC, NFKB1, NFKBIA, NFKBID, TNF, KEAP1, CHRNA3, ERBB2, CDKN2A, FAS, NEUROD1, CDX2, SFRP1, TWIST1, DNMT3B, SLIT2 | hsa-miR-125a-5p, hsa-miR-125a-3p, hsa-miR-34b, hsa-miR-155, hsa-miR-200b/c, hsa-miR-205, hsa-miR-29 a/b/c[12] | NFKB1[1], TNF, ERBB2, CDKN2A, FAS, NEUROD1, SFRP1, TWIST1, CALCA, DNMT3B, SLIT2[13, 14] | miR-200c was silenced by methylation and down regulated TCF8 and E-cadherin, which result in cancer invasion and deterioration[5]; up regulation of miR-29 make sure normal patterns of DNA methylation, induces reexpression of methylation silenced tumor suppressor genes, such as FHIT and WWOX[7] |
| 7    | GO:0007162_negative regulation of cell adhesion        | CDKN2A, CDH13                                                                                                     | hsa-let-7a, hsa-miR-200b/c                                                                                    | CDKN2A, CDH13, CDH1                                                                     |                                                                                                                                                                                                                                                                                                        |
| 8    | GO:0060191_regulation of lipase activity               |                                                                                                                   | hsa-miR-34b, hsa-miR-200c, hsa-miR-205                                                                        | CALCA                                                                                   |                                                                                                                                                                                                                                                                                                        |
| 9    | GO:0006275_regulation of DNA replication               |                                                                                                                   | hsa-miR-125a-5p, hsa-let-7a, hsa-miR-200b/c, hsa-miR-29b/c                                                    |                                                                                         |                                                                                                                                                                                                                                                                                                        |
| 10   | GO:0061061_muscle structure development                | CHRNA1, ERBB2,                                                                                                    | hsa-miR-125a-3p, hsa-miR-34b,                                                                                 | ERBB2, TWIST1                                                                           |                                                                                                                                                                                                                                                                                                        |

|    |                                                                |                                                                                                                                                                      |                                                                                                                                           |                                                                                              |                                                                                                                                                                                                                                                                                  |
|----|----------------------------------------------------------------|----------------------------------------------------------------------------------------------------------------------------------------------------------------------|-------------------------------------------------------------------------------------------------------------------------------------------|----------------------------------------------------------------------------------------------|----------------------------------------------------------------------------------------------------------------------------------------------------------------------------------------------------------------------------------------------------------------------------------|
|    |                                                                | TWIST1                                                                                                                                                               | hsa-miR-155,<br>hsa-miR-200b/c,<br>hsa-miR-205,<br>hsa-miR-29a/b/c                                                                        |                                                                                              |                                                                                                                                                                                                                                                                                  |
| 11 | GO:0022008_neurogenesis                                        | ASH1<br>YAP1,<br>VEGFC,<br>CHRNA1,<br>ERBB2,<br>KRAS,<br>DAPK3,<br>FAS,<br>NEUROD1/2,OP<br>CML,<br>TWIST1,<br>CDH1,<br>DNMT3B,<br>NAB2,<br>SLIT2                     | hsa-miR-125a-5p,<br>hsa-miR-34b,<br>hsa-miR-155,<br>hsa-let-7a,<br>hsa-miR-200b/c,<br>hsa-miR-205,<br>hsa-miR-29a/b/c                     | ERBB2,<br>KRAS,<br>DAPK3,<br>FAS,<br>OPCML,<br>TWIST1,<br>CDH1,<br>DNMT3B,<br>SLIT2[13, 14]  | miR-34b methylation up regulates c-Met[10]; Methylation makes miR-200c silence and down regulates TCF8 expression, then results in E-cadherin low expression, promote tumor deteriorate[5]                                                                                       |
| 13 | GO:0008543_fibroblast growth factor receptor signaling pathway |                                                                                                                                                                      | hsa-miR-200b/c,<br>hsa-miR-29a/b/c                                                                                                        |                                                                                              |                                                                                                                                                                                                                                                                                  |
| 13 | GO:0035107_appendage morphogenesis                             | HOXA9,<br>TWIST1                                                                                                                                                     | hsa-miR-125a-5p,<br>hsa-miR-34b,<br>hsa-miR-155,<br>hsa-miR-200b/c,<br>hsa-miR-205,<br>hsa-miR-29a/b/c                                    | HOXA9,<br>TWIST1                                                                             |                                                                                                                                                                                                                                                                                  |
| 13 | GO:0035108_limb morphogenesis                                  | COX-2,<br>VEGFC,<br>HOXA9,<br>TWIST1                                                                                                                                 | hsa-miR-125a-5p,<br>hsa-miR-34b,<br>hsa-miR-155,<br>hsa-miR-200b/c,<br>hsa-miR-205,<br>hsa-miR-29a/b/c                                    | HOXA9,<br>TWIST1                                                                             |                                                                                                                                                                                                                                                                                  |
| 15 | GO:0001568_blood vessel development                            | VEGFC,<br>IL8,<br>ERBB2,<br>CDH13,<br>CDX2,<br>SFRP1,<br>EGR1,<br>VEGFA,<br>SLIT2                                                                                    | hsa-miR-34b,<br>hsa-miR-155,<br>hsa-miR-200b/c,<br>hsa-miR-205,<br>hsa-miR-29a/b/c                                                        | IL8,<br>ERBB2,<br>CDH13,<br>CDX2,<br>SFRP1,<br>SLIT2                                         | In lung cancer cells, EGR1 activates VEGFA expression[11]                                                                                                                                                                                                                        |
| 16 | GO:0005576_extracellular region                                | VEGFC,<br>IL8,<br>TNF,<br>FAS,<br>TIMP3 ,<br>LAMA3 ,<br>LAMB3 ,<br>LAMC2 ,<br>TMEFF2,<br>CDH13,<br>SFRP1,<br>EGFL7,<br>KLK13,<br>MMP1,<br>VEGFA,<br>SLIT2[8, 11, 15] | hsa-miR-125a-5p,<br>hsa-miR-125a-3p,<br>hsa-miR-34b,<br>hsa-miR-155,<br>hsa-let-7a,<br>hsa-miR-200b/c,<br>hsa-miR-205,<br>hsa-miR-29a/b/c | IL8,<br>TNF,<br>FAS,<br>TIMP3 ,<br>TMEFF2,<br>CDH13,<br>SFRP1,<br>CALCA,<br>MMP1,<br>SLI[15] | miR-200c was silenced by methylation, down regulated TCF8 and E-cadherin, involving in lung cancer deteriorate[6]. KLK13 was up regulated by demethylation in its promoter, involving in tumor invasion; SLIT2 low expression can down regulate beta-catenin and E-cadherin[16]. |
| 17 | GO:0050793_regulation of developmental process                 | VEGFC,<br>NFKB1,<br>NFKBIA,<br>NFKBID,                                                                                                                               | hsa-miR-125a-5p,<br>hsa-miR-125a-3p,<br>hsa-miR-34b,<br>hsa-miR-155,                                                                      | NFKB1,<br>TNF,<br>ERBB2,<br>CDKN2A ,                                                         | Up regulation of miR-29make sure normal patterns of DNA methylation, induces reexpression of methylation -silenced tumor suppressor                                                                                                                                              |

|      |                                                            |                                                                                                                                                    |                                                                                                       |                                                                                 |                                                                                                                                                                                 |
|------|------------------------------------------------------------|----------------------------------------------------------------------------------------------------------------------------------------------------|-------------------------------------------------------------------------------------------------------|---------------------------------------------------------------------------------|---------------------------------------------------------------------------------------------------------------------------------------------------------------------------------|
|      |                                                            | TNF,<br>KEAP1,<br>CHRNA1,<br>ERBB2,<br>CDKN2A ,<br>FAS,<br>LAMA3 ,<br>NEUROD1,<br>CDX2,<br>SFRP1,<br>TWIST1,<br>DNMT3B,<br>VEGFA,<br>SLIT2[11, 17] | hsa-miR-200b/c,<br>hsa-miR-205,<br>hsa-miR-29<br>a/b/c[7, 12]                                         | FAS,<br>LAMA3 ,<br>SFRP1,<br>TWIST1,<br>CALCA,<br>CDH1,<br>DNMT3B,<br>SLIT2[14] | genes, such as FHIT and WWOX[7]                                                                                                                                                 |
| 18.5 | GO:0010648_negative<br>regulation of cell<br>communication | NFKBIA,<br>NFKBID,<br>SFRP1,<br>WWOX,<br>SLIT2                                                                                                     | hsa-miR-125a-3p,<br>hsa-miR-155,<br>hsa-let-7a,<br>hsa-miR-200b/c,<br>hsa-miR-205,<br>hsa-miR-29a/b/c | SFRP1,<br>SLIT2                                                                 | Up regulation of miR-29 make sure<br>normal patterns of DNA methylation,<br>induces reexpression of methylation<br>silenced tumor suppressor<br>genes, such as FHIT and WWOX[7] |
| 18.5 | GO:0023057_negative<br>regulation of signaling             | NFKBIA,<br>NFKBID,<br>SFRP1,<br>WWOX,<br>SLIT2                                                                                                     | hsa-miR-125a-3p,<br>hsa-miR-155,<br>hsa-let-7a,<br>hsa-miR-200b/c,<br>hsa-miR-205,<br>hsa-miR-29a/b/c | SFRP1,<br>SLIT2                                                                 |                                                                                                                                                                                 |
| 20   | GO:0019216_regulation<br>of lipid metabolic<br>process     | NFKB1,<br>TNF                                                                                                                                      |                                                                                                       | NFKB1,<br>TNF                                                                   |                                                                                                                                                                                 |

## Reference

1. Babbar N, H.A., Huang Y, Casero RA Jr., *Tumor necrosis factor alpha induces spermidine/spermine N1-acetyltransferase through nuclear factor kappaB in non-small cell lung cancer cells.* J Biol Chem., 2006. **281(34)**: p. 24182-92.
2. Nakanaga T, N.J., Ueki IF, Koff JL, Shao MX, *Regulation of interleukin-8 via an airway epithelial signaling cascade.* Am J Physiol Lung Cell Mol Physiol, 2007. **292(5)**: p. 1289-96.
3. Greenman, C., Stephens, P., Smith, R., Dalgliesh, G. L., Hunter, C., Bignell, G., Davies, H., Teague, J., Butler, A., Stevens, C. and et al., *Patterns of somatic mutation in human cancer genomes.* Nature, 2007. **446**: p. 153-158.
4. Lili JIANG, Q.Z., Jihong CHANG, Xueshan QIU, Enhua WANG, *hsa-miR-125a-5p Enhances Invasion Ability in Non-Small Lung Carcinoma Cell Lines.* Chin J Lung Cancer, 2009. **12(9)**: p. 951-955.
5. Ceppi P, M.G., Kumarswamy R, Rapa I, Scagliotti GV, Papotti M, Allgayer H., *Loss of miR-200c expression induces an aggressive, invasive, and chemoresistant phenotype in non-small cell lung cancer.* Mol Cancer Res., 2010. **8(9)**: p. 1207-16.
6. Hurteau GJ, C.J., Spivack SD, Brock GJ., *Overexpression of the microRNA hsa-miR-200c leads to reduced expression of transcription factor 8 and increased expression of E-cadherin.* Cancer Res., 2007. **67(17)**: p. 7972-6.
7. Fabbri M, G.R., Cimmino A, Liu Z, Zanesi N, Callegari E, Liu S, Alder H, Costinean S, Fernandez-Cymering C, Volinia S, Guler G, Morrison CD, Chan KK, Marcucci G, Calin GA, Huebner K, Croce CM., *MicroRNA-29 family*

- reverts aberrant methylation in lung cancer by targeting DNA methyltransferases 3A and 3B.* Proc Natl Acad Sci U S A., 2007. **104(40)**: p. 15805-10.
8. Ding, L., Getz, G., Wheeler, D. A., Mardis, E. R., McLellan, M. D., Cibulskis, K., Sougnez, C., Greulich, H., Muzny, D. M., Morgan, M. B. and et al., *Somatic mutations affect key pathways in lung adenocarcinoma.* Nature, 2008. **455(7216)**: p. 1069-1075.
  9. X Xiang, X.Z., S Ju, S Zhang, H Jiang, J Mu, L Zhang, D Miller, W Grizzle and H.-G. Zhang, *miR-155 promotes macroscopic tumor formation yet inhibits tumor dissemination from mammary fat pads to the lung by preventing EMT.* Oncogene, 2011. **30(31)**: p. 3440-53.
  10. Watanabe K, E.N., Hamano E, Sunohara M, Kawakami M, Kage H, Kitano K, Nakajima J, Goto A, Fukayama M, Nagase T, Yatomi Y, Ohishi N, Takai D., *Genome structure-based screening identified epigenetically silenced microRNA associated with invasiveness in non-small-cell lung cancer.* Int J Cancer., 2011. **epub ahead of print.**
  11. Jorgen WESCHE1, K.H. and E.M. HAUGSTEN, *Fibroblast growth factors and their receptors in cancer.* Biochem J., 2011. **437**: p. 199-213.
  12. Nozomu Yanaihara, N.C., Elise Bowman, Masahiro Seike, Kensuke Kumamoto, Ming Yi, Robert M. Stephens, Aikou Okamoto, Jun Yokota, Tadao Tanaka, George Adrian Calin, Chang-Gong Liu, Carlo M. Croce and C.C. Harris, *Unique microRNA molecular profiles in lung cancer diagnosis and prognosis.* Cancer Cell, 2006. **9(3)**: p. 189-198.
  13. Belinsky, S.A., *Gene-promoter hypermethylation as a biomarker in lung cancer.* Nature Reviews Cancer, 2004. **4**: p. 707-717.
  14. Selamat SA, G.J., Joshi AD, Fyfe MN, Campan M, Siegmund KD, Kerr KM, Laird-Offringa IA., *DNA methylation changes in atypical adenomatous hyperplasia, adenocarcinoma in situ, and lung adenocarcinoma.* PLoS One., 2011. **6(6)**: p. e21443.
  15. Tellez CS, J.D., Do K, Bernauer AM, Thomas CL, Damiani LA, Tessema M, Leng S, Belinsky SA., *EMT and stem cell-like properties associated with miR-205 and miR-200 epigenetic silencing are early manifestations during carcinogen-induced transformation of human lung epithelial cells.* Cancer Res., 2011. **71(8)**: p. 3087-97.
  16. Chou RH, L.S., Wen HC, Wu CW, Chang WS, *Epigenetic activation of human kallikrein 13 enhances malignancy of lung adenocarcinoma by promoting N-cadherin expression and laminin degradation.* Biochem Biophys Res Commun, 2011. **409(3)**: p. 442-7.
  17. Toyooka S, M.T., Soh J, Aokage K, Yamane M, Oto T, Kiura K, Miyoshi S., *Molecular oncology of lung cancer.* Gen Thorac Cardiovasc Surg, 2011. **59(8)**: p. 527-37.
  18. Weiss, J., Sos, M. L., Seidel, D., Peifer, M., Zander, T., Heuckmann, J. M., Ullrich, R. T., Menon, R., Maier, S., Soltermann, A. and et al., *Frequent and focal FGFR1 amplification associates with therapeutically tractable FGFR1*

- dependency in squamous cell lung cancer*. Sci. Transl. Med., 2010. **2**: p. 62-93.
19. Warburton, D., El-Hashash, A., Carraro, G., Tiozzo, C., Sala, F., Rogers, O., De Langhe, S., Kemp, P. J., Riccardi, D., Torday, J. and et al., *Lung organogenesis*. Curr. Top. Dev. Biol., 2010. **90**: p. 73-158.
  20. M., F., *The search for improved systemic therapy of non-small cell lung cancer--what are today's options?* Lung Cancer, 2011. **72(3)**: p. 265-70.
  21. Lili JIANG, Q.Z., Hongji CHANG, Xueshan QIU, Enhua WANG, *hsa-miR-125a-5p Enhances Invasion in Non-small Cell Lung Carcinoma Cell Lines by Upregulating Rock-1*. Chin J Lung Cancer, 2009. **12(10)**: p. 1069-1073.
  22. Helen Davies, C.H., Raffaella Smith, *Somatic Mutations of the Protein Kinase Gene Family in Human Lung Cancer*. Cancer Res., 2005. **65(17)**: p. 7591-7595.
  23. Liu L, W.J., Wu C, Wang Y, Zhong R, Zhang X, Tan W, Nie S, Miao X, Lin D, *A functional polymorphism (-1607 1G → 2G) in the matrix metalloproteinase-1 promoter is associated with development and progression of lung cancer*. Cancer, 2011. **epub ahead of print**: p. e26154.
